# Supplementary material
Source: PubMed Central journal article supplement (PMC9382608)
Supplement: 253_2022_12113_MOESM1_ESM.pdf [file 253_2022_12113_MOESM1_ESM.pdf]

**Journal: “APPLIED MICROBIOLOGY AND BIOTECHNOLOGY”**

**Manuscript title: “Development of robust, indigenous ELISA for detection of IgG antibodies against CoV-2 N and S proteins: mass screening”**

Ashish Kumar Srivastava<sup>1</sup>, Avinash Gupta<sup>1</sup>, Deepika Chauhan<sup>1</sup>, Ramesh Chand Meena<sup>1</sup>, Ragumani Sugadev<sup>1</sup>, Malleswara Rao Eslavath<sup>1</sup>, Harshita Gupta<sup>1</sup>, Karuna<sup>1</sup>, Sayar Singh<sup>1</sup>, Yamini Singh<sup>1</sup>, R P Tiwari<sup>2</sup>, Veena Kohli<sup>2</sup>, Rajeev Varshney<sup>1</sup>, Lilly Ganju<sup>1#</sup>

1. *Defence Institute of Physiology and Allied Sciences (DIPAS), DRDO, Lucknow Road, Timarpur, Delhi - 110054*
2. *Vanguard Diagnostics Private Limited, Okhla Industrial Area, New Delhi - 110020*

**# Corresponding Author**

*Dr. Lilly Ganju, Scientist ‘G’*

*Associate Director*

*Defence Institute of Physiology and Allied Sciences (DIPAS),*

*Defence Research and Development Organization (DRDO)*

*Min of Defence, Govt. of India*

*Lucknow Road, Timarpur*

*New Delhi-110054*

*Ph- +9111 23883161*

*Email: [lilly.ganju65@gmail.com](mailto:lilly.ganju65@gmail.com)*

## Supplementary Material

**Supplementary Figure Description:** ELISA was used to compare individuals' antibody responses to infection and immunization for SARS-CoV-2. For 123 COVID-19 infected specimens, the mean ELISA OD<sub>450</sub> for IgG detection was 0.841 with a standard deviation of 0.391. Serum samples from vaccinated (n = 653), infected and vaccinated (n = 237), and non-infected and non-vaccinated (n = 95) participants were also analyzed. Mean optical density at 450 nm (OD<sub>450</sub>) values were 0.868, 1.15, and 0.575 with standard deviations of 0.439, 0.333, and 0.469 respectively.

### Supplementary Figure 1 (S1):

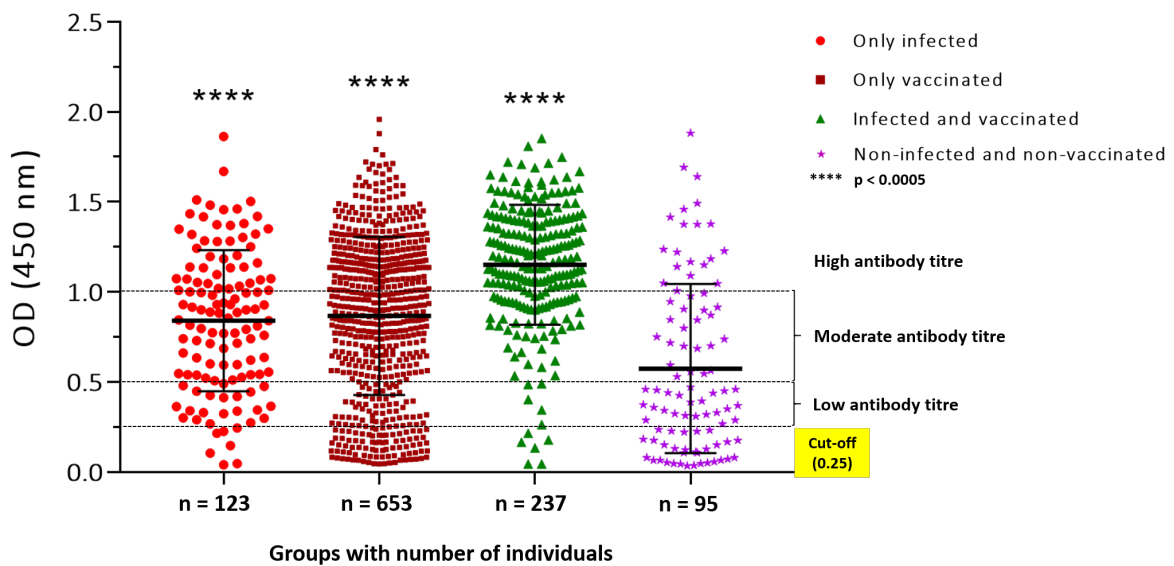

**Supplementary Figure (S1):** Evaluation of the IgG antibody titres against recombinant S and N proteins using “CoroSuchak”. The prevalence of SARS-CoV-2 IgG antibodies was examined in different groups of subjects. An O.D. of 0.25 was considered as cut-off, i.e., O.D. values between 0.25 and 0.5 had low antibody titres, OD values between 0.5 and 1.0 had moderate antibody titres, and O.D. values > 1.0 had high antibody titres of SARS-CoV-2 IgG antibodies. An O.D. of 0.25 was regarded to be the cut-off value. OD<sub>450</sub> was used to plot the test findings for the presence of SARS-CoV-2 IgG antibodies.  $p < 0.05$  was considered to be statistically significant.
